# Supplementary material
Source: publisher site journal article supplement (https://www.dovepress.com/article/224877)
Supplement: Supplementary file 1 [file get_supplementary_file.php]

*Supplementary document*

**A complete list of ADNI sites:**

Oregon Health & Science University; University of Southern California; University of California – San Diego; University of Michigan; Mayo Clinic, Rochester; Baylor College of Medicine; Columbia University Medical Center; Washington University, St. Louis; University of Alabama – Birmingham; Mount Sinai School of Medicine; Rush University Medical Center; Wien Center; Johns Hopkins University; University of South Florida: USF Health ByrdAlzheimer’s Institute; New York University; Duke University Medical Center; University of Pennsylvania; University of Kentucky; University of Pittsburgh; University of Rochester Medical Center; University of California Irvine IMIND; University of Texas Southwestern MedicalSchool; Emory University; University of Kansas, Medical Center; University of California, Los Angeles; Mayo Clinic, Jacksonville; Indiana University; Yale University School of Medicine; McGill Univ., Montreal-Jewish GeneralHospital; Sunnybrook Health Sciences, Ontario; U.B.C. Clinic for AD & Related Disorders; St. Joseph’s Health Care; Northwestern University; Nathan Kline Institute; UC San Francisco; Georgetown University Medical Center; Brigham and Women's Hospital; Stanford University; Banner Sun Health Research Institute; Boston University; Howard University; Case Western Reserve University; University of California, Davis – Sacramento; Dent Neurologic Institute; Parkwood Institute; University of Wisconsin; Banner Alzheimer's Institute; Ohio State University; Albany Medical College; University of Iowa College of Medicine; Wake Forest University Health Sciences; Rhode Island Hospital; Cleveland Clinic Lou Ruvo Center for BrainHealth; Roper St. Francis Healthcare; Houston Methodist Neurological Institute; Barrow Neurological Institute; Vanderbilt University Medical Center; Long Beach VA Neuropsychiatric ResearchProgram; Butler Hospital Memory and Aging Program; Neurological Care of CNY; Hartford Hospital, Olin NeuropsychiatryResearch Center; Dartmouth-Hitchcock Medical Center; Cornell University
